# Supplementary material
Source: PubMed Central journal article supplement (PMC7848744)
Supplement: pnas.2018521118.sapp.pdf [file pnas.2018521118.sapp.pdf]

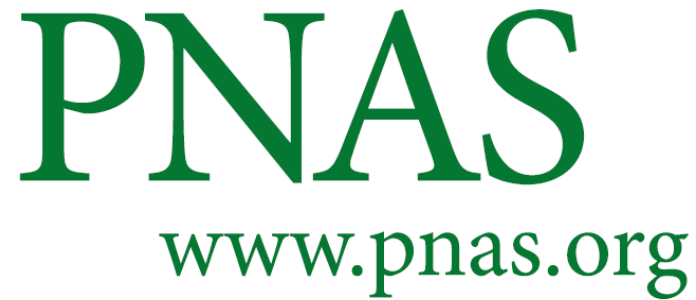

## Supplementary Information for

Bifurcation of excited state trajectories towards energy transfer or electron transfer directed by wavefunction symmetry

Paola S. Oviedo, Luis M. Baraldo, Alejandro Cadranel.

Alejandro Cadranel

Email: [acadranel@qi.fcen.uba.ar](mailto:acadranel@qi.fcen.uba.ar)

Luis M Baraldo

Email: [baraldo@qi.fcen.uba.ar](mailto:baraldo@qi.fcen.uba.ar)

### **This PDF file includes:**

Figs. S1 to S16

Table S1

UV-vis absorption spectra and spectroelectrochemistry of RuRuCr and RuCr<sup>-</sup>

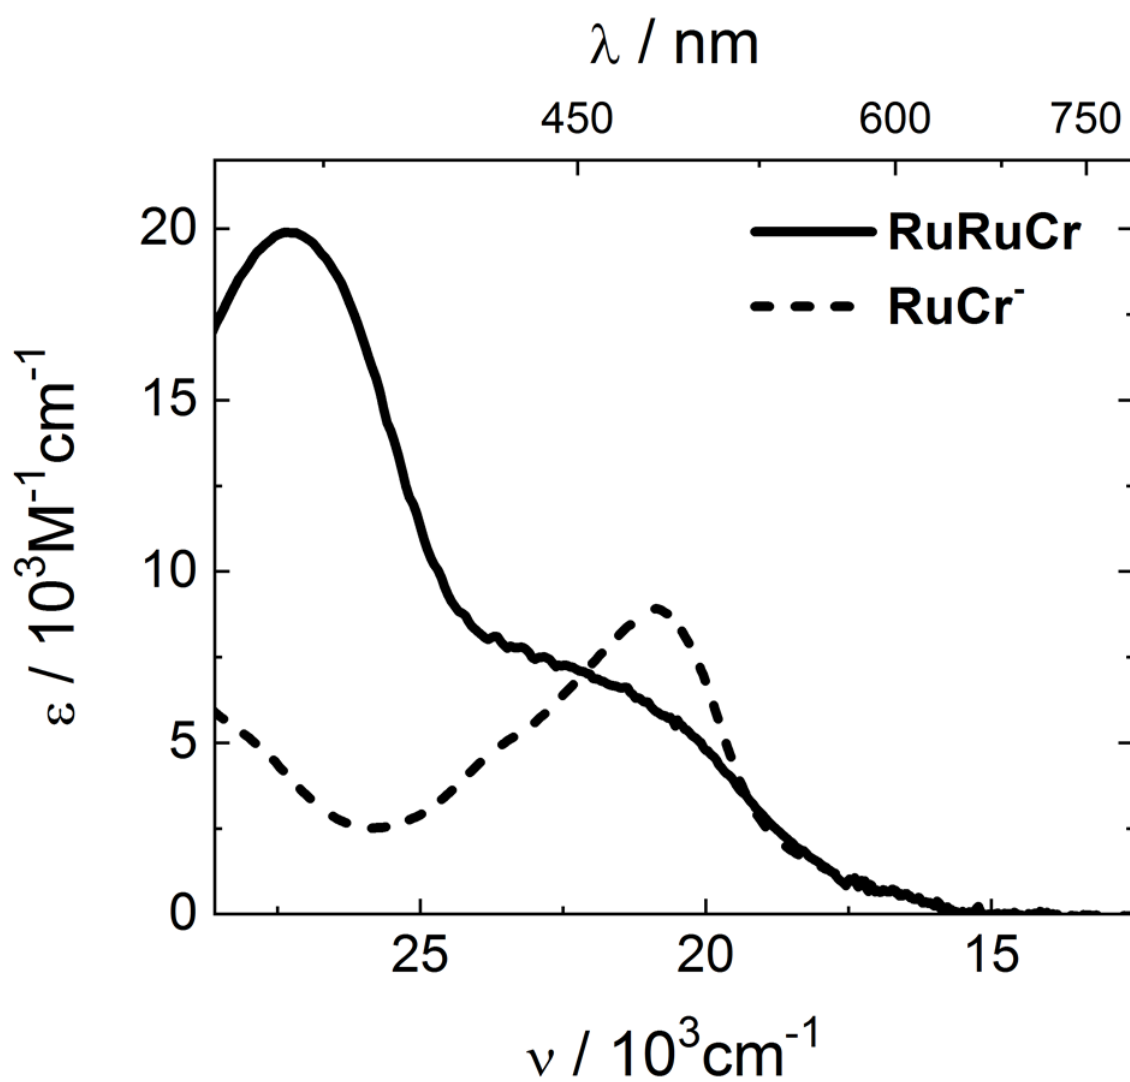

**Fig. S1.** Absorption spectra of RuRuCr and RuCr<sup>-</sup> in DMSO at room temperature.

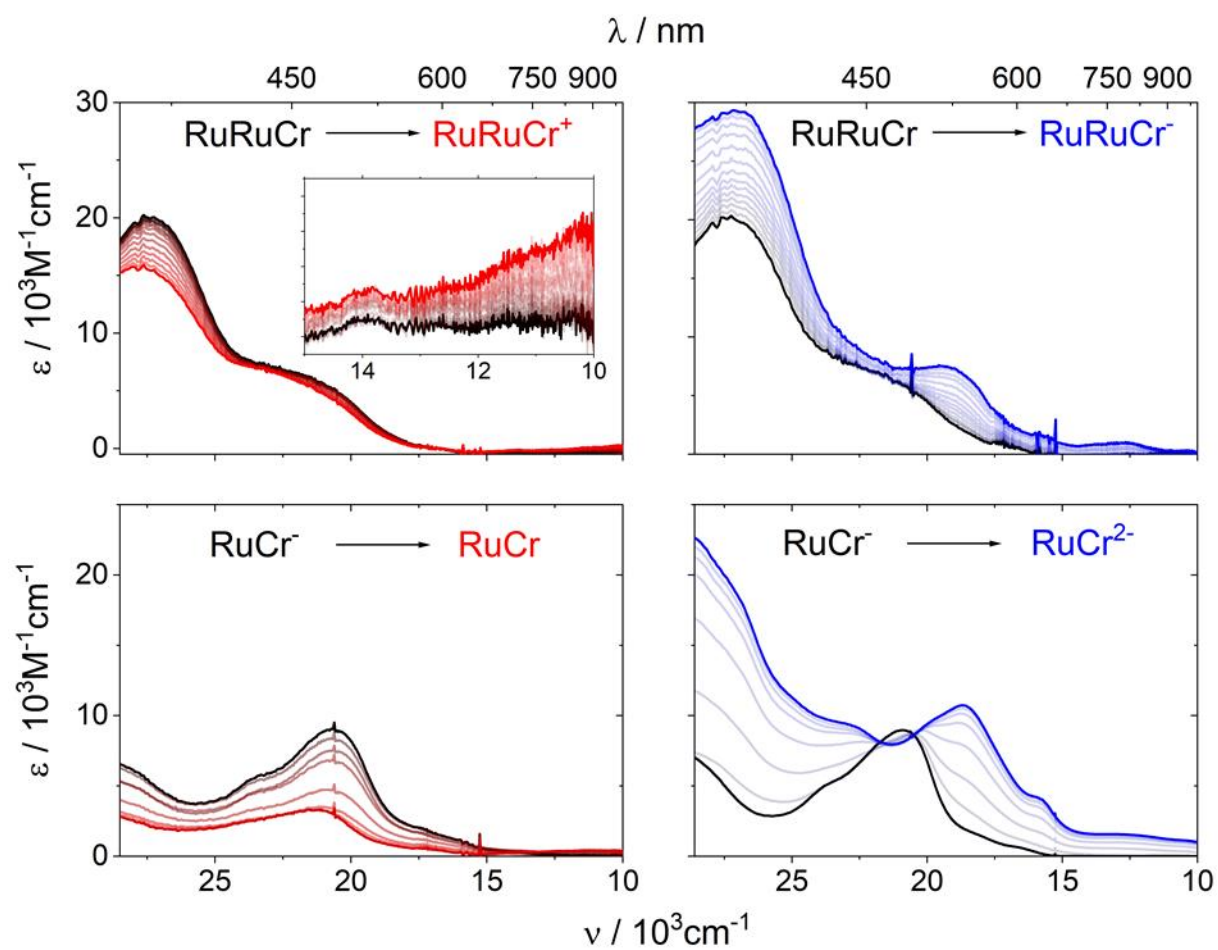

**Fig. S2.** Evolution of the absorption spectra upon one electron oxidation (left) and one electron reduction (right) of RuRuCr in DMSO (top) and RuCr<sup>-</sup> in ACN (bottom) at room temperature. Spectra of the original (black), oxidized (red) and reduced (blue) species are shown.

### nsTAS of RuRuCr in DMSO

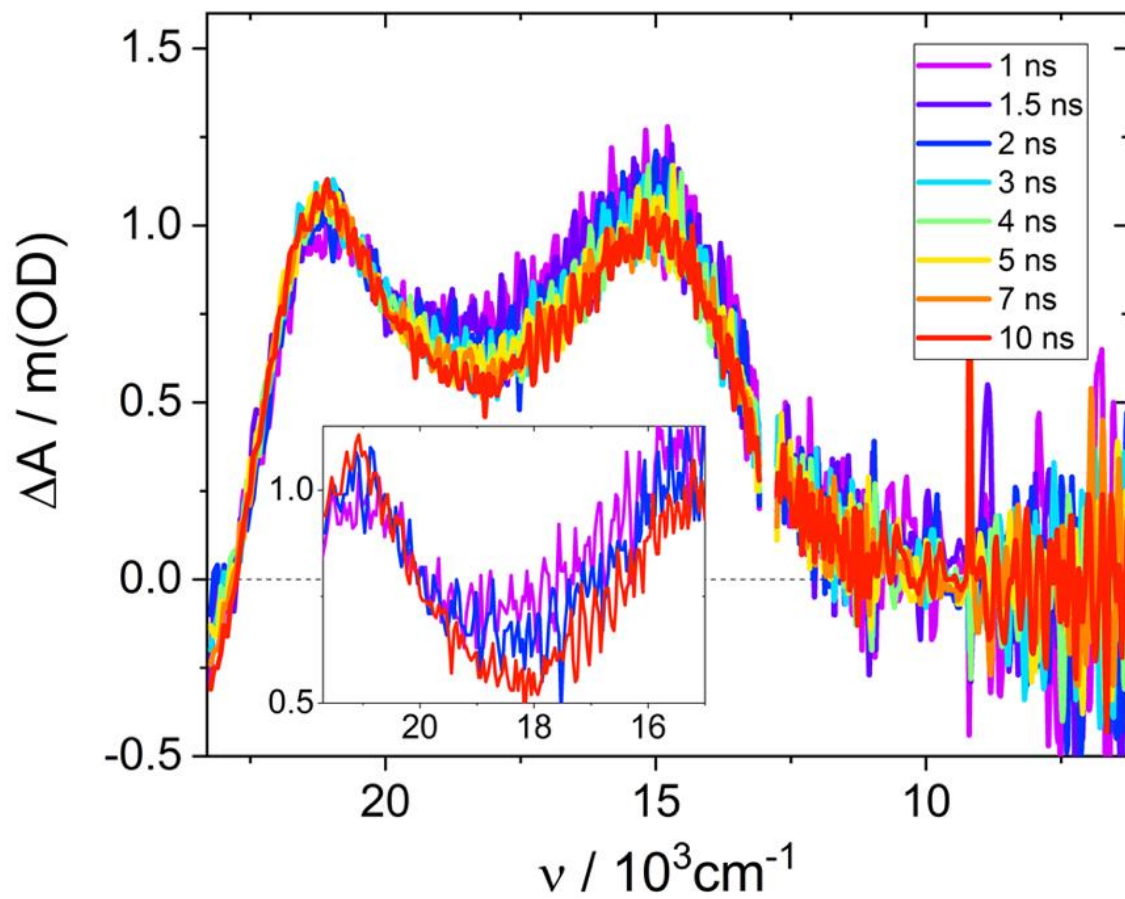

**Fig. S3.** nsTA spectra of RuRuCr at selected time delays in DMSO at room temperature, under  $25800 \text{ cm}^{-1}$  (387 nm) excitation.

**Table S1.** Transient absorption spectroscopy data obtained upon target analysis of RuRuCr and RuCr.

|               |                  | fsTAS                                   |                                                 |                                            |                                            |                                                | nsTAS                                      |                                                |
|---------------|------------------|-----------------------------------------|-------------------------------------------------|--------------------------------------------|--------------------------------------------|------------------------------------------------|--------------------------------------------|------------------------------------------------|
|               |                  | $\nu_{\text{ex}} / 10^3 \text{cm}^{-1}$ | ${}^3\text{MLCTr} / \text{hot-}{}^3\text{MLCT}$ | ${}^3\text{MLCTz}$                         | ${}^3\text{MLCTxy}$                        | ${}^2\text{E}$                                 | ${}^3\text{MLCTxy}$                        | ${}^2\text{E}$                                 |
|               |                  |                                         | $\tau / \text{ps}$<br>$k / \text{ps}^{-1}$      | $\tau / \text{ps}$<br>$k / \text{ps}^{-1}$ | $\tau / \text{ns}$<br>$k / \text{ns}^{-1}$ | $\tau / \mu\text{s}$<br>$k / \mu\text{s}^{-1}$ | $\tau / \text{ns}$<br>$k / \text{ns}^{-1}$ | $\tau / \mu\text{s}$<br>$k / \mu\text{s}^{-1}$ |
| <b>RuRuCr</b> | DMSO             | 25.8                                    | 6<br>(0.164<br>$\pm 0.007$ )                    | 106<br>(9.40<br>$\pm 0.15$ )               | 0.95<br>(1.044<br>$\pm 0.002$ )            | n.r.                                           | 4.4<br>(0.23<br>$\pm 0.04$ )               | 13.1<br>(0.08<br>$\pm 0.02$ )                  |
|               |                  | 19.8                                    | 1.5<br>(0.632<br>$\pm 0.003$ )                  | 110<br>(9.1<br>$\pm 0.1$ )                 | 1.50<br>(0.67<br>$\pm 0.02$ )              | n.r.                                           | -                                          | -                                              |
| <b>RuCr</b>   | DMSO             | 19.8                                    | n.o.                                            | 5.2<br>(0.1913<br>$\pm 0.0002$ )           | n.r.                                       |                                                | 8.3<br>(0.121 $\pm$<br>0.003)              | 17.4<br>(0.05742<br>$\pm$<br>0.00006)          |
|               | H <sub>2</sub> O | 19.8                                    | n.o.                                            | 5.2<br>(0.1911<br>$\pm 0.0002$ )           | 0.95<br>(0.10535 $\pm$<br>0.00007)         | n.r.                                           | n.r.                                       | 0.376<br>(2.658 $\pm$<br>0.003)                |

n.r.: not resolved due to timescale constraints. n.o.: not observed.

nsTAS of RuCr<sup>-</sup> in DMSO

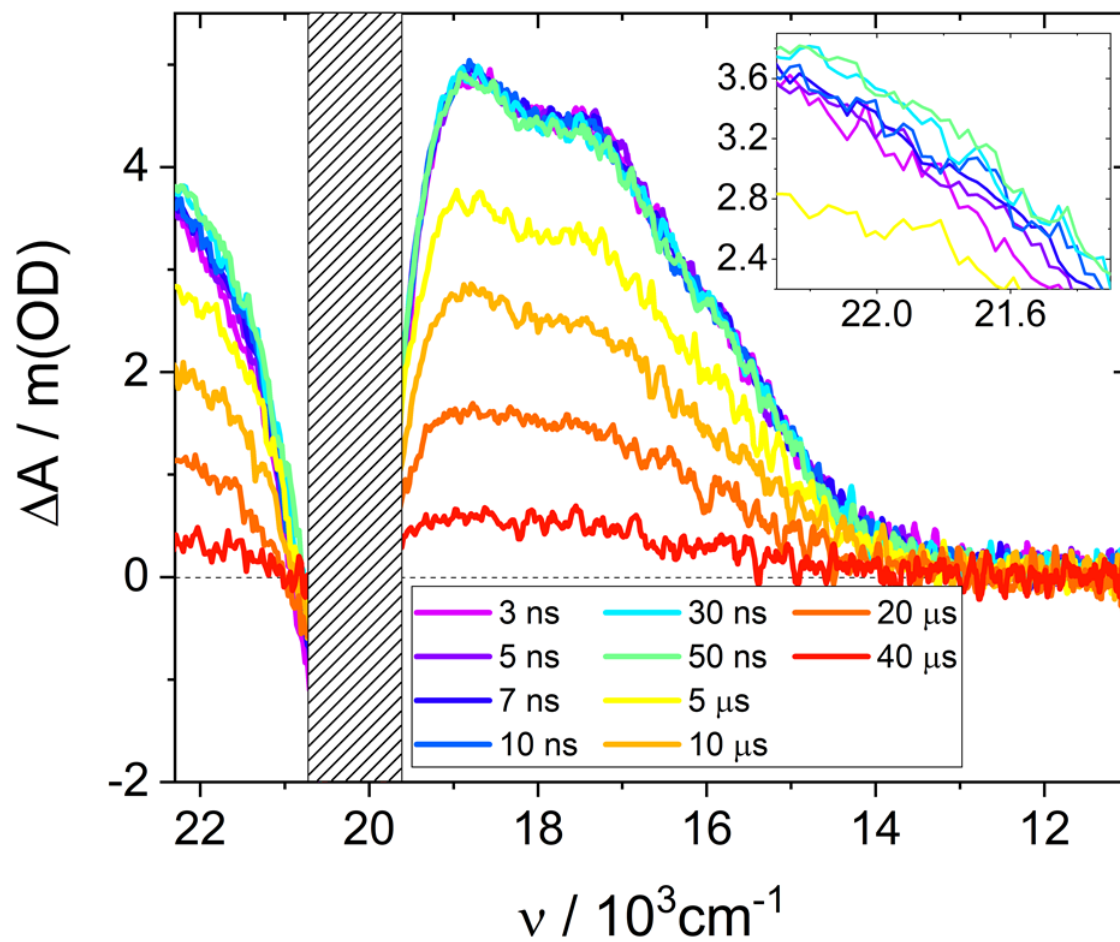

**Fig. S4.** nsTA spectra of RuCr<sup>-</sup> in DMSO at room temperature, under 25800 cm<sup>-1</sup> (505 nm) excitation.

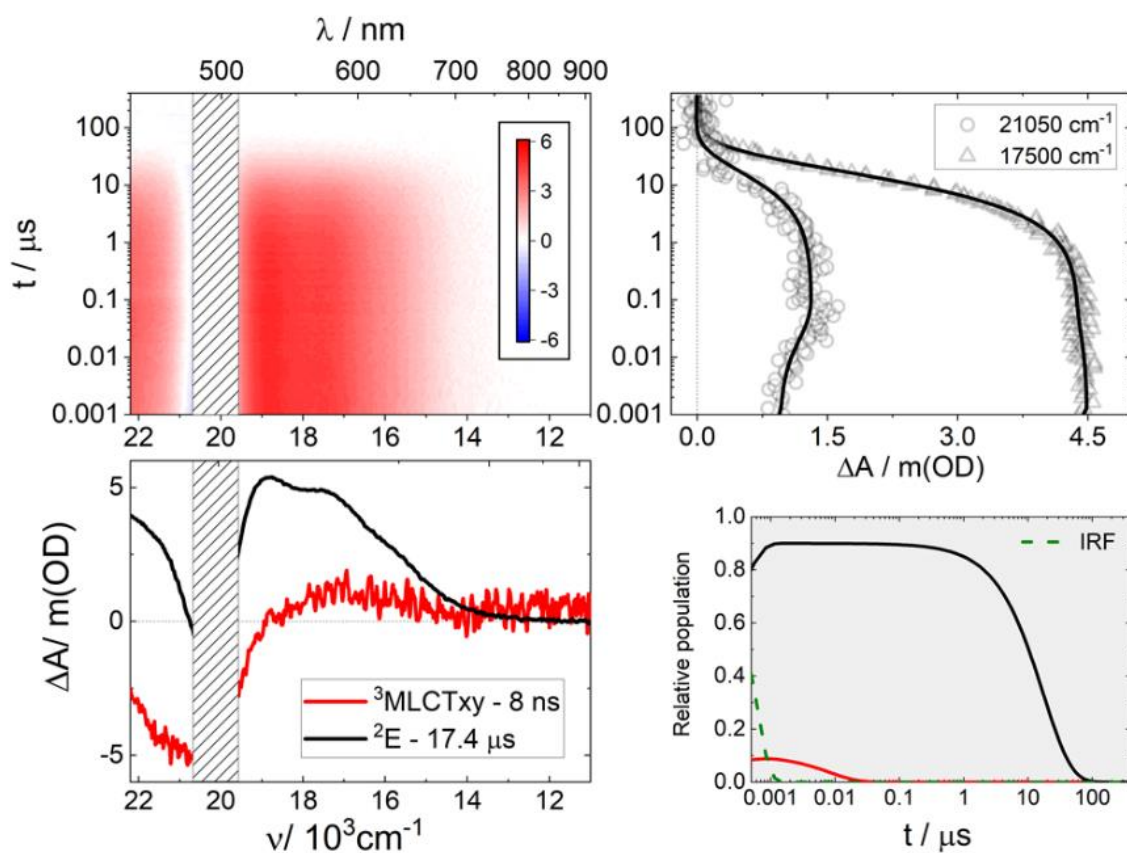

**Fig. S5.** Differential absorption 3D map obtained from nsTAS with  $19800\text{ cm}^{-1}$  ( $505\text{ nm}$ ) excitation of  $\text{RuCr}^+$  in DMSO at room temperature (upper left). Species associated differential spectra of  $^3\text{MLCT}_{xy}$  and  $^2\text{E}(\text{Cr})$  (bottom left). Differential absorption kinetic traces at  $17500$  and  $21050\text{ cm}^{-1}$  (upper right), and relative populations of  $^3\text{MLCT}_{xy}$  and  $^2\text{E}(\text{Cr})$  (bottom right).

fsTAS of RuRuCr in DMSO

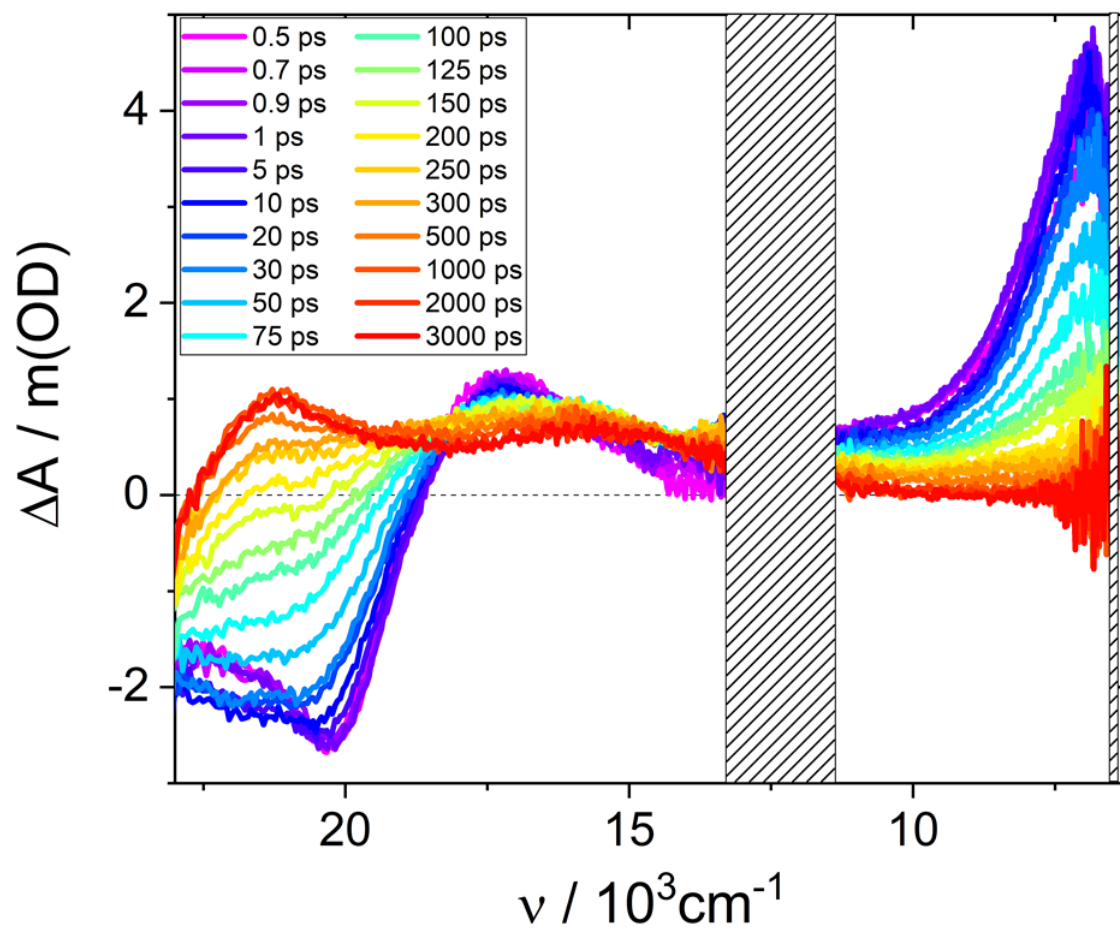

**Fig. S6.** fsTA spectra of RuRuCr at selected time delays in DMSO at room temperature, under 25800  $\text{cm}^{-1}$  (387 nm) excitation.



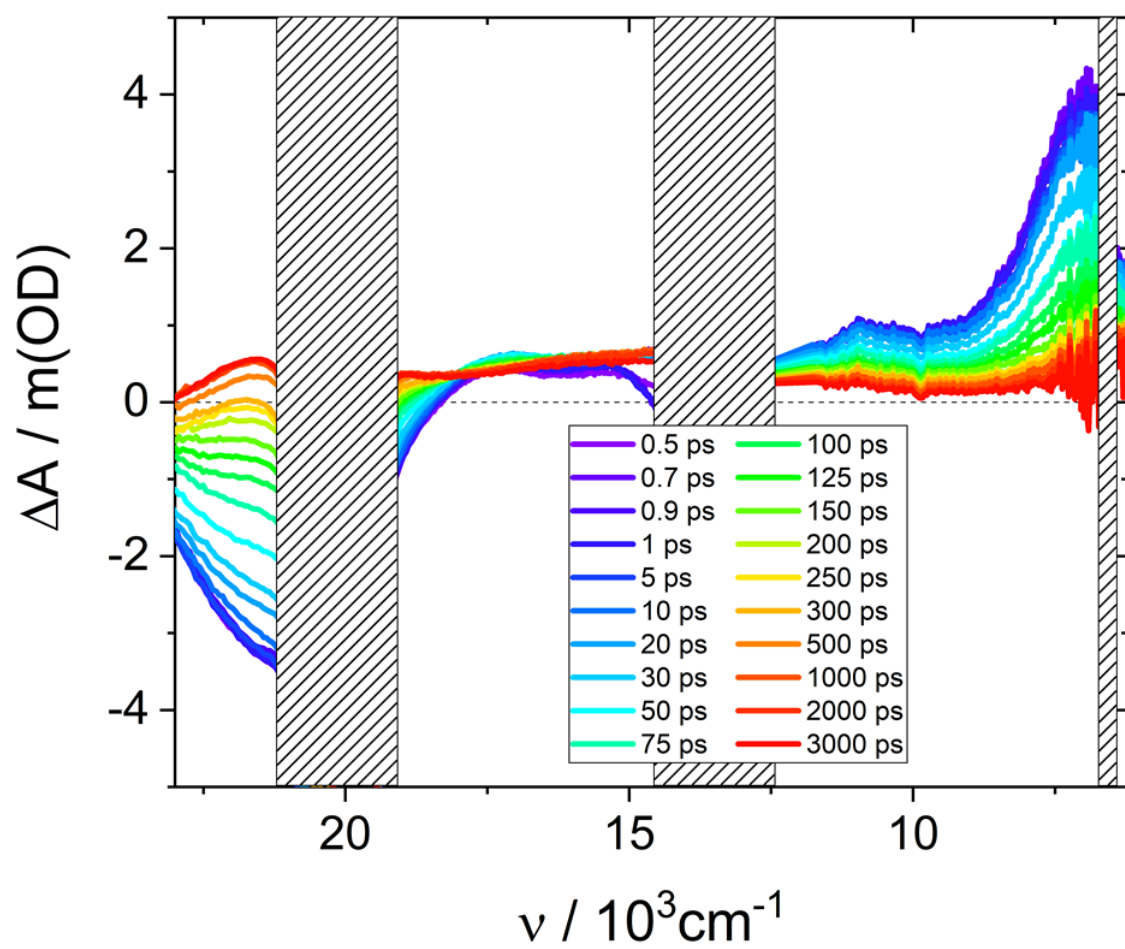

**Fig. S7.** fsTA spectra of RuRuCr at selected time delays in DMSO at room temperature, under 19800  $\text{cm}^{-1}$  (505 nm) excitation.

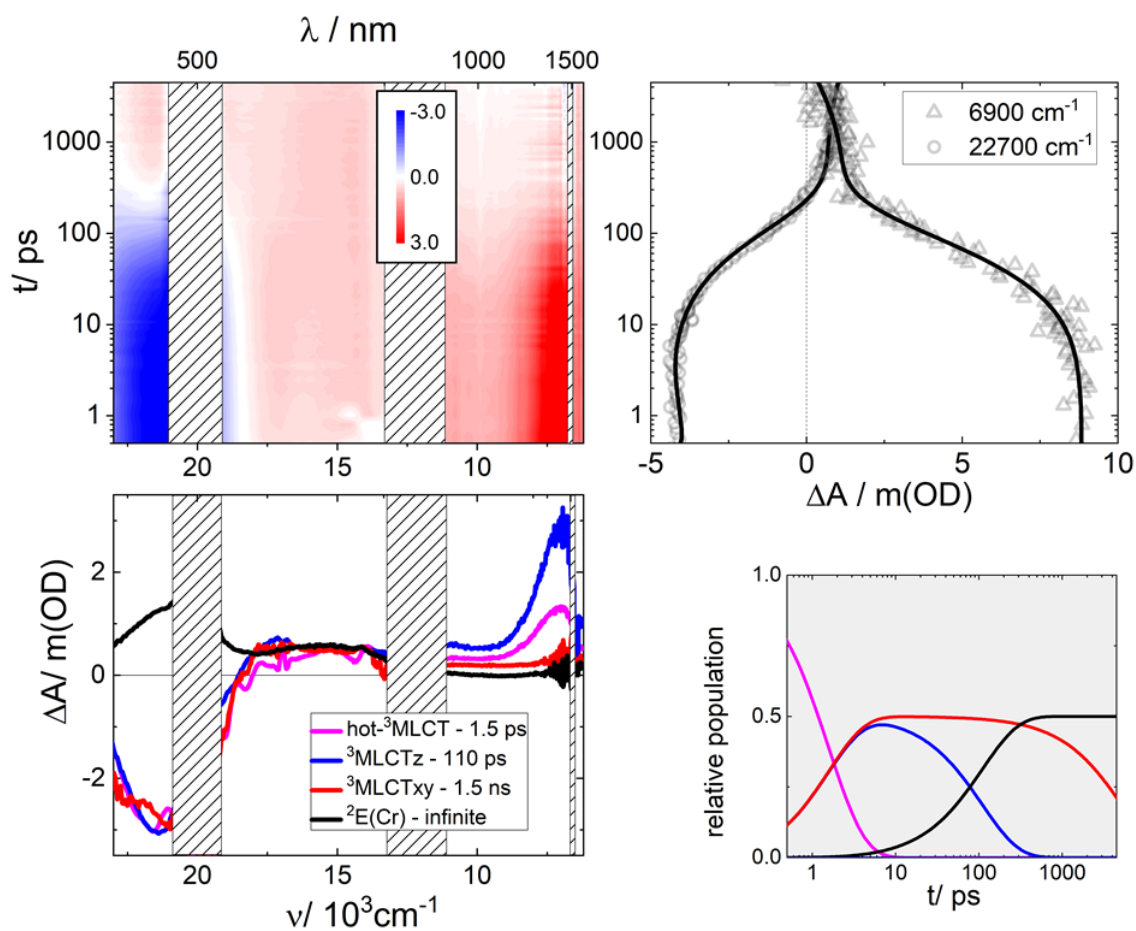

**Fig. S8.** Differential absorption 3D map obtained from fsTAS with  $19800\text{ cm}^{-1}$  (505 nm) excitation of RuRuCr in DMSO at room temperature (upper left). Species associated differential spectra of **hot- $^3\text{MLCT}$** ,  $^3\text{MLCTz}$ ,  $^3\text{MLCTxy}$  and  $^2\text{E}(\text{Cr})$  (bottom left). Differential absorption kinetic traces at  $6900\text{ cm}^{-1}$  (upper right), and relative populations of **hot- $^3\text{MLCT}$** ,  $^3\text{MLCTz}$ ,  $^3\text{MLCTxy}$  and  $^2\text{E}(\text{Cr})$  (bottom right).

fsTAS of RuCr<sup>-</sup> in DMSO

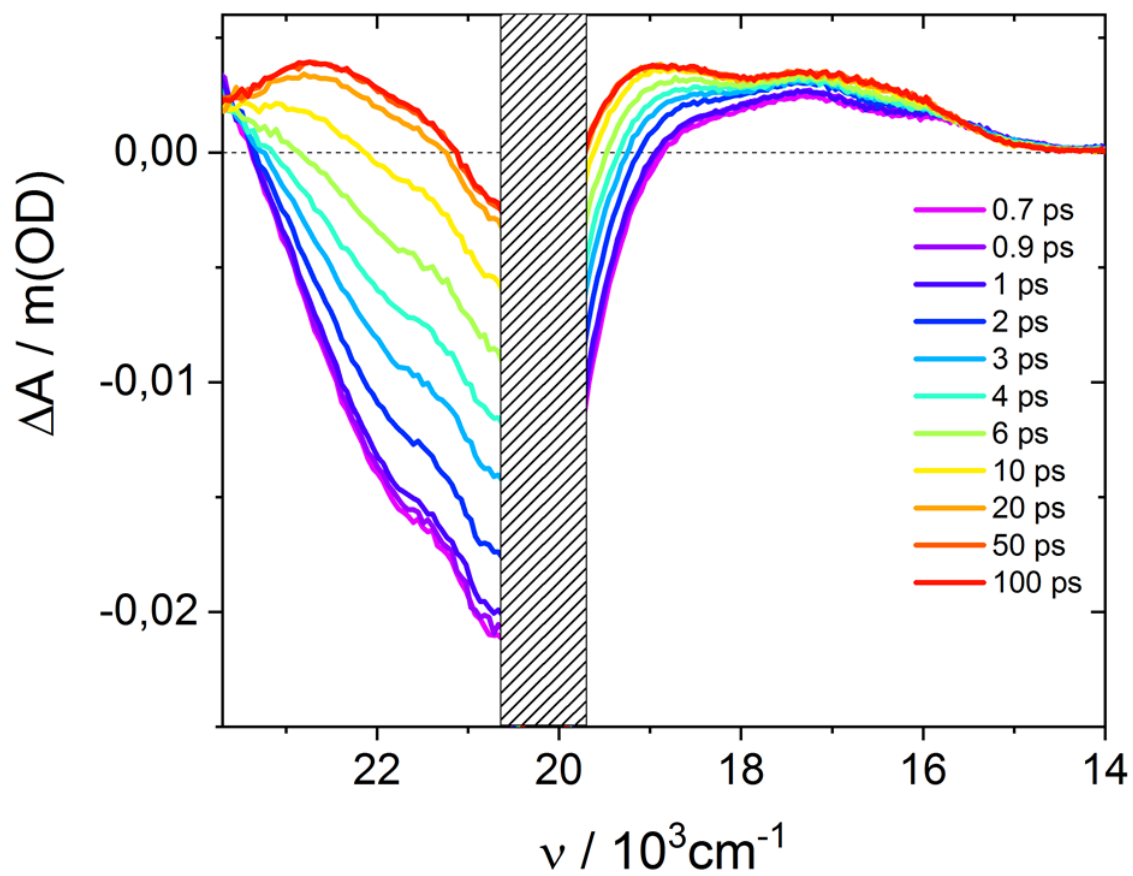

**Fig. S9.** fsTA spectra of RuCr<sup>-</sup> at selected time delays in DMSO at room temperature, under 19800 cm<sup>-1</sup> (505 nm) excitation.

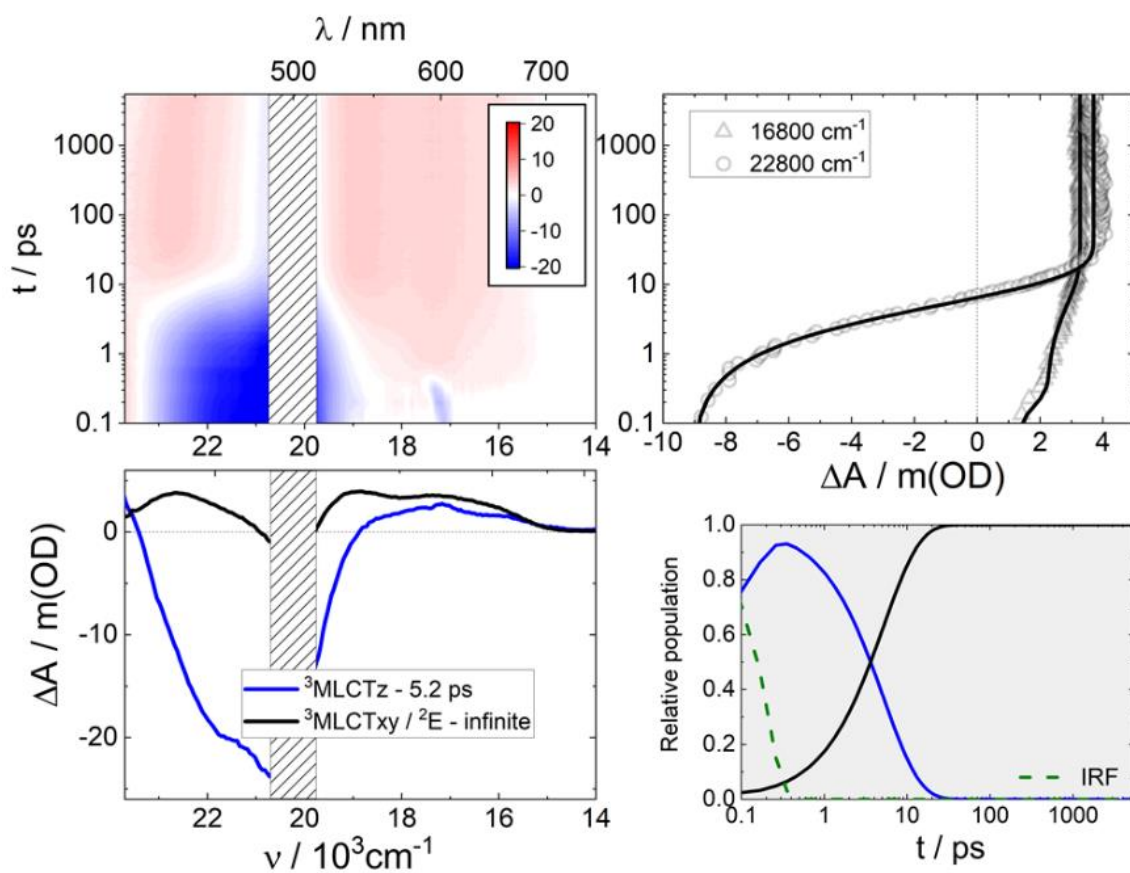

**Fig. S10.** Differential absorption 3D map obtained from fsTAS with  $19800\text{ cm}^{-1}$  (505 nm) excitation of RuCr in DMSO at room temperature (upper left). Species associated differential spectra of  ${}^3\text{MLCTz}$  and  ${}^3\text{MLCTxy} / {}^2\text{E}(\text{Cr})$  (bottom left). Differential absorption kinetic traces at  $16800\text{ cm}^{-1}$  and  $22800\text{ cm}^{-1}$  (upper right), and relative populations of  ${}^3\text{MLCTz}$  and  ${}^3\text{MLCTxy} / {}^2\text{E}(\text{Cr})$  (bottom right).

## Target model for RuCr<sup>-</sup>

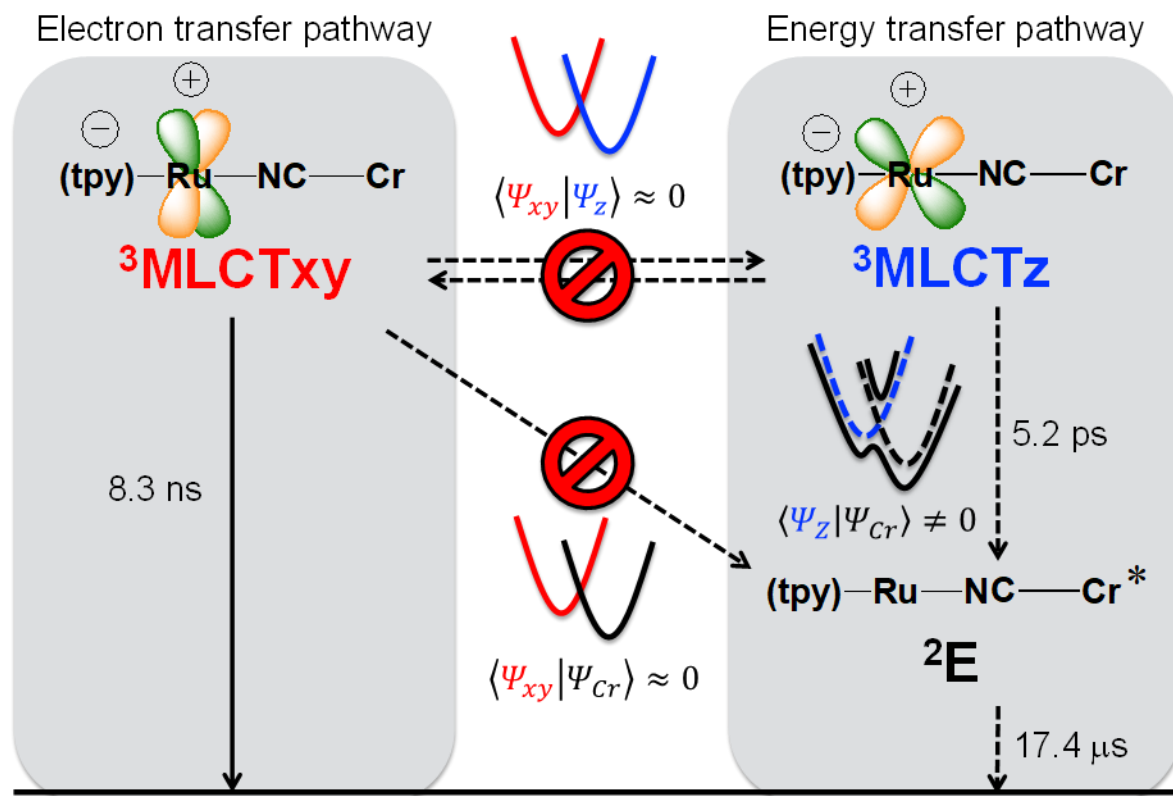

**Fig. S11.** Target model applied to fit the transient absorption data, considering separate electron transfer and energy transfer pathways for RuCr<sup>-</sup>. Electronic coupling between states of different wavefunction symmetry is small and results in two separate reaction pathways.

Results using target models for RuRuCr and RuCr<sup>+</sup> considering that <sup>3</sup>MLCT<sub>xy</sub> feeds <sup>2</sup>E

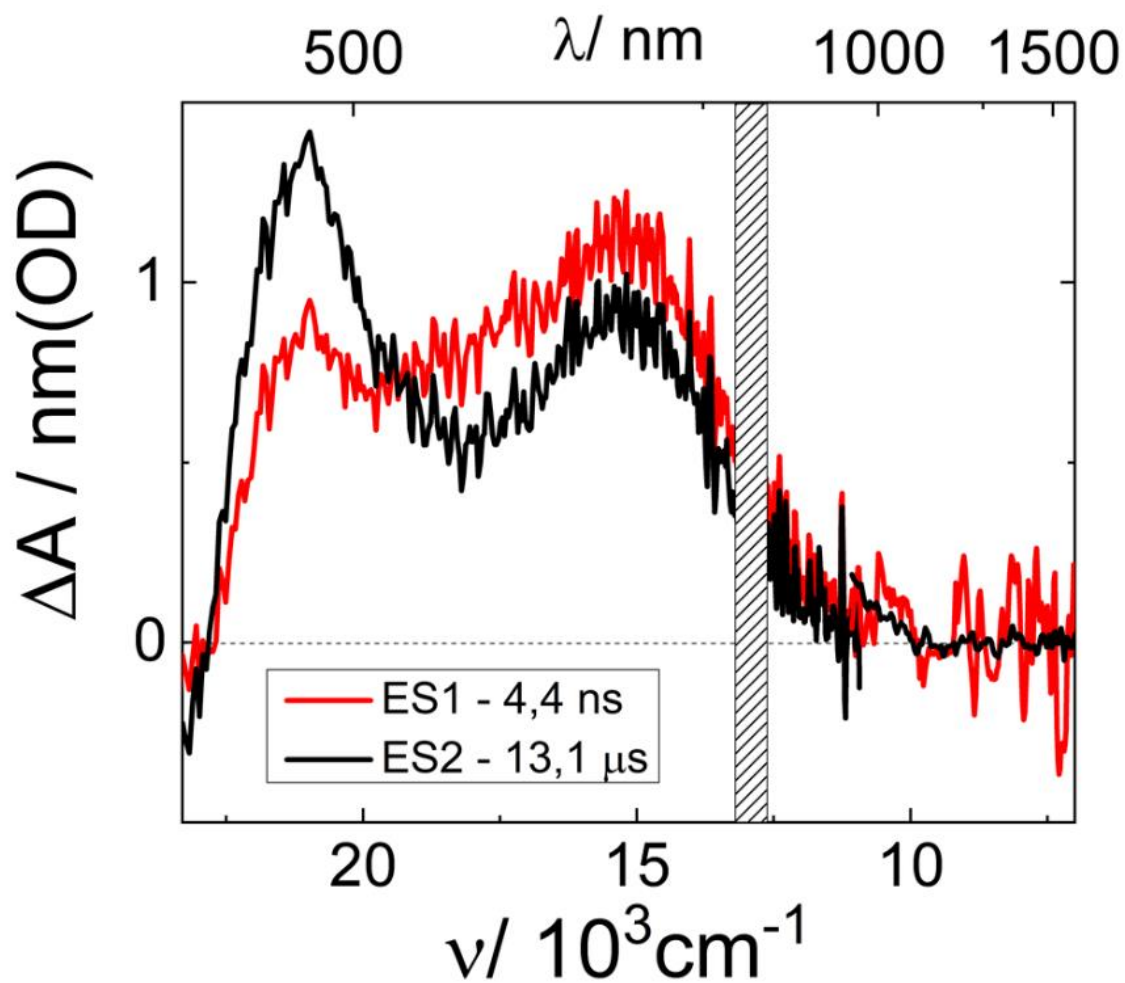

**Fig. S12.** Decay associated spectra obtained from global analysis of nsTAS data for RuRuCr in DMSO at room temperature, under  $25800 \text{cm}^{-1}$  (387 nm) excitation.

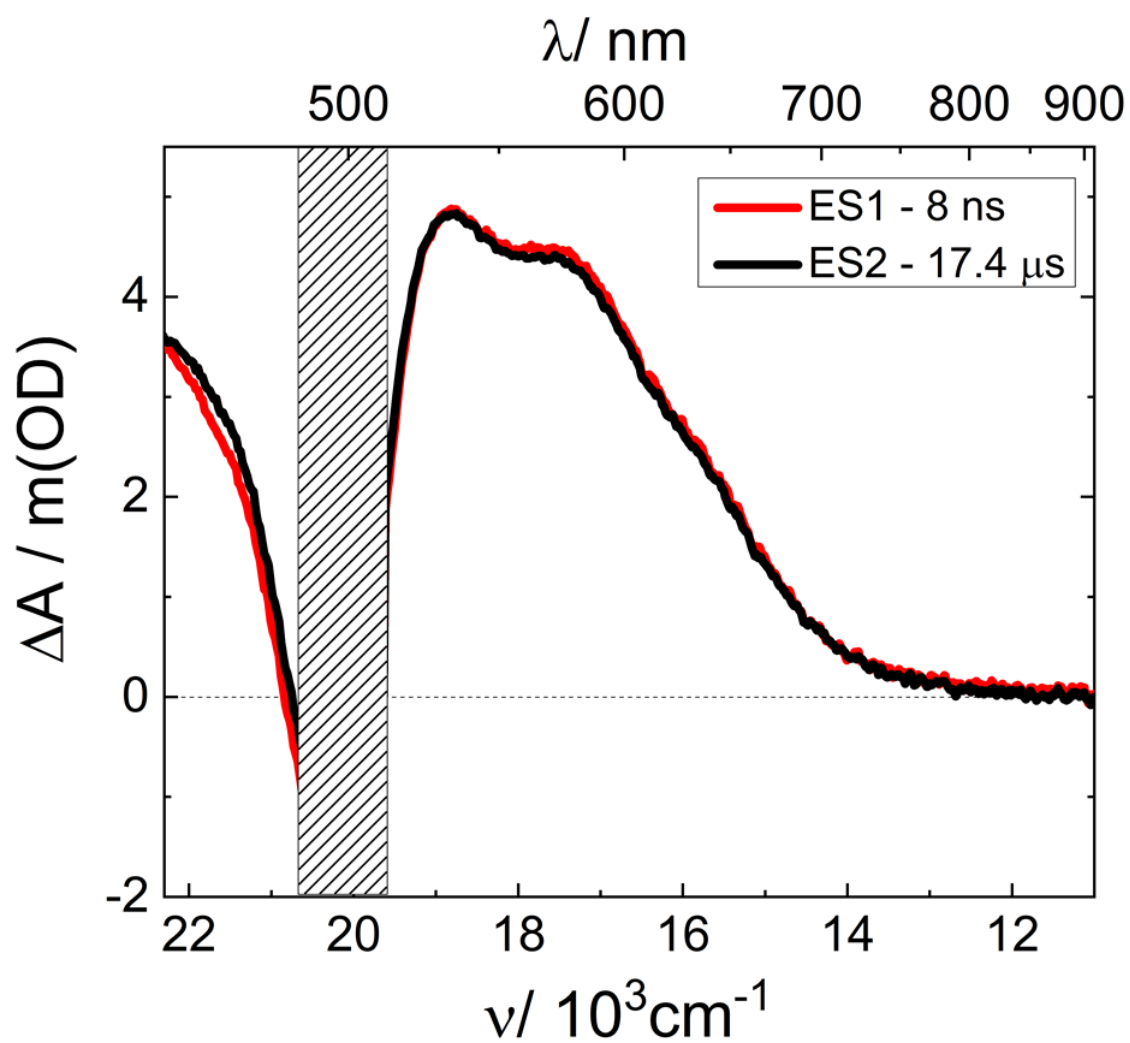

**Fig. S13.** Decay associated spectra obtained from global analysis of nsTAS data for RuCr<sup>-</sup> in DMSO at room temperature, under 19800 cm<sup>-1</sup> (505 nm) excitation.

Photolysis experiments of RuRuCr and RuCr<sup>-</sup> in DMSO

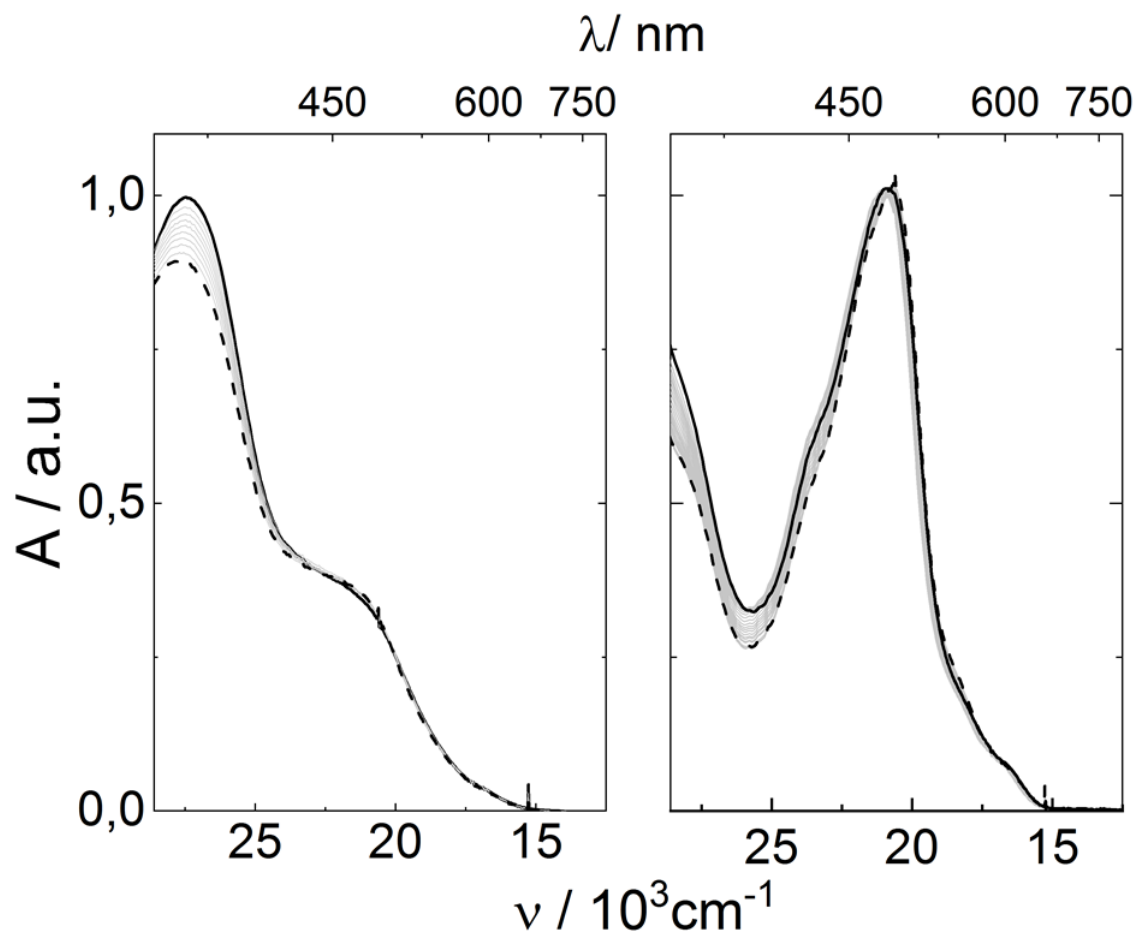

Fig. S14. Evolution of the absorption spectra of RuRuCr (left) and RuCr<sup>-</sup> (right) upon 4 hour illumination at 450 nm.



## nsTAS and fsTAS of RuCr<sup>+</sup> in H<sub>2</sub>O

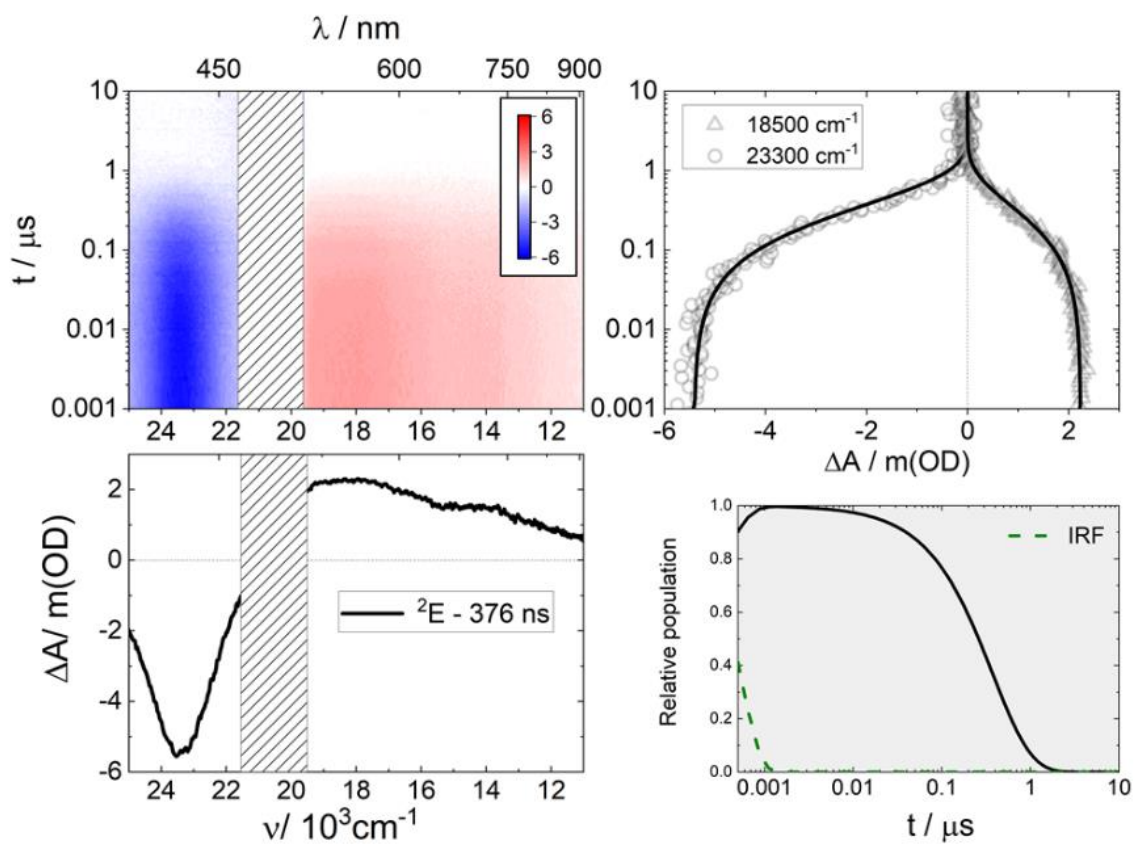

**Fig. S15.** Differential absorption 3D map obtained from nsTAS with 19800 cm<sup>-1</sup> (505 nm) excitation of RuCr<sup>+</sup> in H<sub>2</sub>O at room temperature (upper left). Species associated differential spectra of <sup>2</sup>E(Cr) (bottom left). Differential absorption kinetic traces at 18500 and 23300 cm<sup>-1</sup> (upper right), and relative populations of <sup>2</sup>E(Cr) (bottom right).

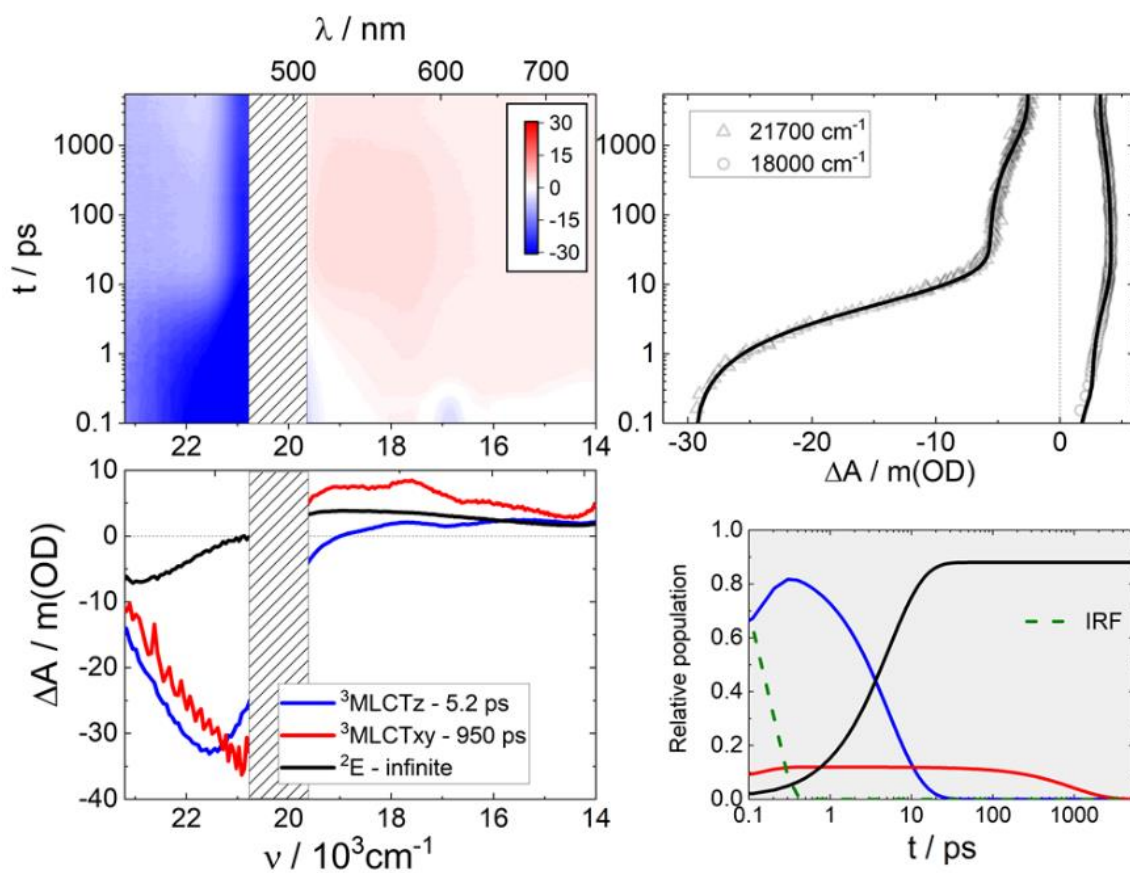

**Fig. S16.** Differential absorption 3D map obtained from fsTAS with  $19800\text{ cm}^{-1}$  (505 nm) excitation of  $\text{RuCr}^+$  in  $\text{H}_2\text{O}$  at room temperature (upper left). Species associated differential spectra of  ${}^3\text{MLCT}_z$ ,  ${}^3\text{MLCT}_{xy}$  and  ${}^2\text{E}(\text{Cr})$  (bottom left). Differential absorption kinetic traces at  $18000$  and  $21700\text{ cm}^{-1}$  (upper right), and relative populations of  ${}^3\text{MLCT}_z$ ,  ${}^3\text{MLCT}_{xy}$  and  ${}^2\text{E}(\text{Cr})$  (bottom right).
